## **Effect of migration and environmental heterogeneity on the maintenance of quantitative variation: a simulation study**

Authors: Tegan Krista McDonald, Sam Yeaman  
*Department of Biological Sciences, University of Calgary*

Running Title: *Environmental heterogeneity and maintenance of variation*

Correspondence should be sent to:  
Tegan Krista McDonald, via email at [tegankmcdonald@gmail.com](mailto:tegankmcdonald@gmail.com)

Keywords: *mutation-selection balance, theory, genetic variation, migration, environmental heterogeneity*

### **Acknowledgements**

We would like to thank D. Lindtke for providing feedback during the writing of this manuscript and M. Turelli for clarifying a theoretical point that SY had muddled. TKM would also like to thank J. Mee for assistance with early stages of the R code. This research was enabled in part by computational support provided by WestGrid and Compute Canada, and was funded by an AIHS grant to SY.

## 1 **Abstract**

2 The paradox of high genetic variation observed in traits under stabilizing selection is a  
3 longstanding problem in evolutionary theory, as mutation rates are 10-100 times too low to  
4 explain observed levels of standing genetic variation under classic models of mutation-selection  
5 balance. Here, we use individual-based simulations to explore the effect of various types of  
6 environmental heterogeneity on the maintenance of genetic variation ( $V_A$ ) for a quantitative trait  
7 under stabilizing selection. We find that  $V_A$  is maximized at intermediate migration rates in  
8 spatially heterogeneous environments, and that the observed patterns are robust to changes in  
9 population size. Spatial environmental heterogeneity increased variation by as much as 10-fold  
10 over mutation-selection-balance alone, whereas pure temporal environmental heterogeneity  
11 increased variance by only 45% at max. Our results show that some combinations of spatial  
12 heterogeneity and migration can maintain considerably more variation than mutation-selection  
13 balance, potentially reconciling the discrepancy between theoretical predictions and empirical  
14 observations. However, given the narrow regions of parameter space required for this effect, this  
15 is unlikely to provide a general explanation for the maintenance of variation. Nonetheless, our  
16 results suggest that habitat fragmentation may affect the maintenance of  $V_A$  and thereby reduce  
17 the adaptive capacity of populations.

## 18 Introduction

19 As genetic variation is the fundamental basis upon which evolution acts, it is important to  
20 understand how variation is maintained in order to provide a foundation for answering various  
21 questions in biology and related fields, such as missing heritability (Maher, 2008), conservation  
22 of biodiversity (Cook & Sgrò, 2017), and population potential to respond to change (Houle,  
23 1992). And yet, the relative importance of factors that influence variation and the mechanism(s)  
24 under which it is maintained are not wholly understood (Barton & Turelli, 1989; Mackay *et al.*,  
25 2009). The majority of quantitative traits experience stabilizing selection, which in theory should  
26 erode genetic variation. However, high levels of standing variation and heritability of  
27 quantitative traits are consistently observed in nature (Johnson & Barton, 2005). This paradox – a  
28 high degree of genetic variation maintained in the face of stabilizing selection – remains a  
29 longstanding, unsolved problem in evolutionary biology and quantitative genetics theory.

30  
31 The most widely studied explanation for this paradox is mutation-selection balance (henceforth  
32 referred to as MSB), the appeal of which lies in its intuitive logic: mutation, as the ultimate  
33 source of genetic variation, provides enough input to offset the eroding effect of selection,  
34 leading to a state of equilibrium. Under such models, stabilizing selection is assumed according  
35 to a Gaussian fitness function with parameter  $V_S$  setting the strength of selection on genotypes  
36 (where large values result in weaker selection). Multiple MSB models have been proposed, most  
37 notably the continuum-of-alleles model from Kimura and Crow (1964) of which two main  
38 approximations have been put forth: the Gaussian approximation (Kimura 1965; later expanded  
39 by Lande 1976), and the House-of-cards approximation (Turelli, 1984; Bürger *et al.*, 1989).  
40 The continuum-of-alleles model makes the basic assumption that for a locus with a continuous  
41 distribution of possible alleles, mutation can result in a new allele with an effect different from  
42 the pre-existing one. In general, the two approximations differ in the way each handles this  
43 assumption. For example, for an arbitrary diploid locus  $i$  with an allele of effect  $x_i$  and a mutation  
44 with effect  $y_i$ , under the Gaussian approximation the mutated allele would take on a new value  
45 which is conditional on the previous state ( $x_i + y_i$ ). This results in a predicted equilibrium genetic  
46 variance  $V_G(G) \cong 2n\sqrt{\mu\alpha^2V_S}$ , where  $n$  is the total number of loci that compose the quantitative  
47 trait,  $\mu$  the per locus mutation rate, and  $\alpha^2$  the variance of the distribution of mutational effects.

48 Under the House-of-Cards approximation,  $x_i$  may take on any effect independent from  $x_{i+1} \dots x_n$ ,  
49 and mutation results in the replacement of  $x_i$  by  $y_i$ . In this case, the predicted equilibrium  
50 variance,  $V_G(HC) \cong 4n\mu V_S$  is independent of the distribution of mutation effects. In contrast with  
51 the continuum-of-alleles model, there is the diallelic model (Bulmer, 1972; Barton, 1986), which  
52 assumes only two possible values at a locus with equal forward and backward mutation rates,  
53 such that mutation causes a flip between states (*e.g.*,  $x_i = \{0,1\}$ ). In this case, the resulting  
54 equilibrium variance has been shown to be generally comparable to  $V_G(HC)$ .

55 Although these models have been extensively studied, conflicting evidence over their  
56 applicability in relation to realistic biologic parameters has left debate open (Barton & Turelli,  
57 1989; Johnson & Barton, 2005; Zhang & Hill, 2005). The assumptions and requirements of these  
58 models are unrealistic: primarily, they require extreme mutation rates or too many loci per trait  
59 (Johnson & Barton, 2005). This can be most simply illustrated by considering two empirical  
60 observations: heritability,  $h^2$ , for the majority of traits are relatively high ( $h^2 = 0.2 \sim 0.6$ ;  
61 Mousseau and Roff 1987), and stabilizing selection is typically relatively strong in nature, as  
62 evidenced by the median value of estimates of reported quadratic selection gradient ( $\gamma = -0.1$ ;  
63 Kingsolver *et al.*, 2001). The value  $\gamma = -0.1$  implies that the ratio of selection to phenotypic  
64 variation is  $V_S / V_P = 5$  (Kingsolver *et al.*, 2001; Johnson & Barton, 2005), which can be  
65 rearranged to account for typical estimates of heritability, yielding an expected empirical range of  
66 values for variation maintained in a natural population of approximately  $0.04 < V_A / V_S < 0.12$ .  
67 Putting this in the context of Turelli's (1984)  $V_G(HC)$  model under the assumption that  $V_G \sim V_A$ ,  
68 then  $0.01 < n\mu < 0.03$ . If there are 100 loci underlying a given trait, then this would require per-  
69 locus mutation rates on the order of  $\sim 10^{-4}$ , which is 10 to 100 times higher than most estimates  
70 from quantitative genetic studies, typically thought to be in the range of  $10^{-6}$  to  $10^{-5}$  (Barton &  
71 Turelli, 1989; Bürger, 2000).

72 More complex extensions of these models have been investigated (Bürger *et al.*, 1989; Zhang  
73 & Hill, 2002; Zhang *et al.*, 2002, 2004), namely by extending to multiple traits, such that  
74 'apparent stabilizing selection' is generated through pleiotropic effects. Pure pleiotropy and joint  
75 effects models have been studied, as well as other extensions to include factors such as  
76 dominance or balancing selection. Nonetheless, these models have yet to provide a sufficient

77 explanation for the patterns of variation maintained as suggested by empirical data (Johnson &  
78 Barton, 2005; but see Zhang and Hill 2005).

79 The above models all assume stabilizing selection to a constant environment, and yet  
80 environments varying in space and time can also affect the maintenance of variation. If  
81 environmental heterogeneity can maintain sufficient differences in allele frequencies within a  
82 subdivided population, and migrant individuals introduce novel variants that can be maintained  
83 for some time, then migration can result in an increase in genetic variation within a population.  
84 Structured populations with limited amounts of gene flow have the potential to increase within-  
85 population variance (Lythgoe, 1997; Tufto, 2000; Spichtig & Kawecki, 2004), and a temporally  
86 fluctuating environment has been shown in some cases to increase variance under particular  
87 regions of parameter space (Kondrashov & Yampolsky, 1996; Bürger & Gimelfarb, 2002;  
88 Gulisija & Kim, 2015). However, these studies have not explicitly framed results in terms of the  
89 relative increase in variance over mutation-selection to address the problem of the discrepancy  
90 between MSB predictions and empirical observations, and the effect(s) of time and space have  
91 not been investigated simultaneously.

92 Here, we assess how different kinds of environmental heterogeneity affect the maintenance of  
93 genetic variation. We simulate spatial and temporal heterogeneity both independently and  
94 simultaneously to explore how the maintenance of variation is affected by variation in migration  
95 rate, population size, mutation rate, strength of selection, and pattern of environmental variability.  
96 In all cases, we explicitly focus on comparing heterogeneous vs. homogeneous environments to  
97 represent the increase in variance relative to that expected under mutation-selection balance. This  
98 provides some indication of how much more variance can be maintained under heterogeneous  
99 environments, which can be compared to the discrepancy between the mutation-selection balance  
100 predictions and empirical observations described above.

## 101 **Methods**

### 102 **Simulation Setup**

103 A diploid Wright-Fisher two-population scenario was modeled using the stochastic, individual-  
104 based simulation program *Nemo* (v2.3.45; Guillaume and Rougemont 2006) under various  
105 parameter combinations of population size  $N$  (1000, 10000), strength of selection  $V_S$  (2, 5, 10),  
106 mutation rate  $\mu$  ( $10^{-6}$ ,  $10^{-5}$ ,  $10^{-4}$ ), and backwards migration  $m$  (rate ranging from  $10^{-5}$  to 0.1 per

107 generation) between two equal sized patches with some local optima  $\theta$ . See Table 1 for detailed  
108 reference of all parameters.

109 In each simulation, relative fitness is determined by Gaussian stabilizing selection acting on a  
110 single quantitative trait of 50 unlinked loci, each with an independent allelic value  $a$  ( $n = 50$ ;  $r =$   
111  $0.5$ ). Nemo defines individual fitness of a quantitative trait according to the equation:

$$W(z) = \exp \left[ -\frac{(z - \theta)^2}{2w^2} \right]$$

112 Where  $z$  is the phenotypic value of the individual, equal to  $\sum a_i$ ,  $\theta$  the local optimum, and  $w^2$  the  
113 strength of selection on the phenotype ( $V_S = w^2 + V_E$ ). As no effect of environmental variance  
114 was included ( $V_E = 0$ ), hereafter we use  $V_S$  to represent the strength of selection on the genotype  
115 to simplify comparison to theoretical models. The allelic value ( $a$ ) at each locus is randomly  
116 drawn from a gamma distribution (mean = 0.05, shape = 1), with mutation causing a change of  
117 states  $\pm a$  (this follows a pseudo-diallelic model with a House-of-Cards mutation scheme). Loci  
118 have additive effects on the phenotype, with no dominance or epistasis and free recombination  
119 between adjacent loci ( $r = 0.5$ ). Thus, genetic architecture cannot evolve through addition of  
120 multiple successive mutations at a given locus or through competition among alleles with  
121 different linkage relationships.

122 A total of six scenarios were run, each differing in the relation of local optima between patches:

- 123 (1) **Homogenous patches** ( $\theta_1 = \theta_2 = 1$ ). The control set used for comparison to the other  
124 scenarios; the local optimum is the same in each patch such that any differences that arise are  
125 due to drift rather than selection.
- 126 (2) **Pure spatial heterogeneity** ( $\theta_1 = +1$ ;  $\theta_2 = -1$ ). This set of simulations introduced spatial  
127 environmental heterogeneity with opposite local optima between each patch.
- 128 (3) **Pure temporal heterogeneity** ( $\theta_{t,1} = \theta_{t,2}$ ). To reflect a population inhabiting a changing  
129 environment, temporal fluctuations were modelled using an oscillating optimum defined by a  
130 sine wave centered about zero with amplitude of 1;  $\theta(t) = \sin \left( \frac{2\pi t}{P} \right)$ . Simulations were run  
131 with varying periodicity ( $P = 4, 16, 40, 100, 1000$ ). The main focus of the analysis considers a  
132 temporal oscillation over 100 generations, unless otherwise specified.

133 (4) **Combined (Spatial & Temporal) heterogeneity.** The last set of simulations combined the  
134 setup of (2) and (3). Three subsets were used to represent differing degrees of spatial  
135 variation (see *SI*): (*A*,  $\theta_{t,1} = -\theta_{t,2}$ ) opposing optima reflected about the horizontal axis; (*B*,  $\theta_{t,1}$   
136  $= \theta_{t,2} + 2$ ) in phase temporal fluctuations with one patch oscillating about -1 and the other  
137 about +1; (*C*,  $\theta_{t,1} = \theta_{t+(P/4),2}$ ) a partial phase shift between optima functions, such that  $\theta_2$  lags  
138 behind  $\theta_1$ .

139 All simulations were run for an initial period of 40,000 generations under these conditions,  
140 allowing the trait value to stabilize at an approximate equilibrium (assessed visually for the  
141 absence of change in trajectory of the trait value over time). A census of the population was taken  
142 every  $t$  generations ( $t=100$ , or  $t=5$  for temporal simulations with  $P \leq 100$  generations) for the  
143 mean trait value and genetic variation (in terms of  $V_A$ , the additive genetic variation) present in  
144 each patch. This data was averaged over the stable period of the last 10,000 generations (1000 for  
145 temporal simulations with  $P \leq 100$ ) for 40 replicates. For consistency, a 40x50 matrix of allele  
146 values was generated such that each replicate had a different complement of mutation effect  
147 sizes, but that this complement was held constant across all simulation scenarios. Under the  
148 simulations that included temporal heterogeneity, preliminary results showed a cycling pattern  
149 emerge for both the trait value and  $V_A$  over time; to use an estimate as representative as possible,  
150 the  $V_A$  maintained within a cycle was sampled at 20 evenly spaced time-points within a cycle,  
151 and the mean calculated over the last ten cycles of the simulation. To obtain a measure of  
152 variation maintained within the simulated population that is comparable to empirical evidence,  
153 the ratio  $V_A / V_S$  was calculated from the final mean  $V_A$  estimate of each simulation set. All data  
154 processing and analysis was done with R v3.3 (R Development Core Team, 2016).

## 155 **Results**

### 156 **Pure Spatial Homogeneity, Set 1 ( $\theta_1 = \theta_2 = 1$ )**

157 We first describe patterns in the homogeneous environment, which acts as a control  
158 demonstrating the effect of finite population MSB processes in a two-patch model, to study the  
159 effects of mutation rate ( $\mu$ ), selection strength ( $V_S$ ), and population size ( $N$ ), on the maintenance  
160 of variation (Figure 1A). As expected from quantitative genetic theory (Falconer and Mackay  
161 1996), variance was somewhat higher in larger populations, although the difference is minimal  
162 under most parameters (Figure S1). Also following expectations,  $V_A$  increases with  $\mu$ , with the

163 effect of mutation rate approximately linear, and independent of selection. Similarly,  $V_A$   
164 increases with  $V_S$  (selection weakens), which qualitatively matches predictions of Turelli (1984),  
165 Burger et al. (1989), and as observed by Yeaman and Guillaume (2009), although some  
166 deviations occur due to differences in the mutation model. While from Figure 1 there appears to  
167 be an interaction between selection and mutation rate, the relative effect of a ten-fold increase in  
168 mutation (from  $\mu = 10^{-5}$  to  $\mu = 10^{-4}$ ) is similar for  $V_S = 2$  versus  $V_S = 10$  ( $V_A$  changes by a factor  
169 of 8.87 vs 8.59 for  $V_S = 2$  vs  $V_S = 10$ ;  $m = 0.1$ ).

170 Notably, these patterns are qualitatively independent of  $N$  (Figure S1), and so the results below  
171 are presented for the subset of  $N = 1000$  only. There is minimal response to rate of migration  
172 between the two patches, except for a small increase at low to intermediate  $m$ , which is consistent  
173 with predictions of Goldstein and Holsinger (1992), and arises due to an interaction between  
174 effects of genetic redundancy and genetic drift (hereafter, referred to as the “redundancy-drift  
175 effect”; see Discussion).

#### 176 **Pure Spatial Heterogeneity, Set 2 ( $\theta_1 = +1$ ; $\theta_2 = -1$ )**

177 With spatial environmental heterogeneity, two key differences arise when compared to the  
178 control case (Set 1): an overall large increase in the amount of  $V_A$  maintained, and the appearance  
179 of a threshold at high migration, above which the divergence among populations and amount of  
180  $V_A$  maintained both decrease (which is qualitatively consistent with the critical migration  
181 threshold predicted by Yeaman and Otto, 2011). While the migration rate at which  $V_A$  peaks  
182 varies as a function of  $V_S$ , the maximum  $V_A$  reached under these parameters ( $\cong 0.32$ ) is similar  
183 among levels of  $V_S$ . Given the number of loci, mutation effect sizes, and mutation rates that we  
184 used, spatial environmental heterogeneity generates up to a ~10-fold increase in  $V_A$  compared to  
185 the homogenous case (for the same parameters,  $V_A[\text{homogeneous}] = 0.033$ ), as shown in Figure  
186 1B. This demonstrates that the redundancy-drift effect described previously by Goldstein and  
187 Holsinger (1992) is small relative to the effect of migration and spatial heterogeneity, at least  
188 under these conditions. Additionally, the effect of mutation becomes relatively less pronounced  
189 under spatial heterogeneity, as most of the variation is maintained by migration in this case.  
190 Whereas a ten-fold change in  $\mu$  (from  $\mu = 10^{-5}$  to  $\mu = 10^{-4}$ ) results in an increase by a factor of  
191 8.87 in Figure 1A, this increase only changes  $V_A$  by a factor of 1.09 under spatial heterogeneity  
192 ( $V_S = 2$ ,  $m = 0.1$ ).



193 **Pure Temporal heterogeneity, Set 3 ( $\theta_{t,1} = \theta_{t,2}$ )**

194 In contrast to the case with spatial heterogeneity, under a temporally fluctuating optimum there is  
195 in general little change in  $V_A$  in comparison to Set 1, the homogenous case. As shown in Figure  
196 2A, a similar qualitative pattern is observed in response to migration rate, with an increase at low  
197 to intermediate  $m$  and rapid drop with  $m > 0.001$ , akin to the redundancy-drift effect observed in  
198 the homogeneous case. The resulting maximum peak in  $V_A$  however is approximately 45%  
199 greater than the homogeneous case ( $V_S = 5$ ,  $\mu = 10^{-4}$ ,  $m = 2.5 \times 10^{-4}$ ), suggesting that temporal  
200 heterogeneity can only marginally increase the importance of this effect.

201 Multiple lengths for the temporal oscillation of the environment (denoted as  $P$ ) were simulated to  
202 test the influence of the period length on the qualitative patterns observed, and complex  
203 interactions were found (Figure S2.1). Setting  $P \leq 100$  resulted in a response to migration similar  
204 to the homogeneous case and an overall increase in  $V_A$  with  $\mu$ , as expected. However, the  
205 behavior for  $P = 100$  deviates under very strong selection ( $V_S = 2$ ), with the redundancy-drift  
206 effect causing a peak in  $V_A$  at lower migration rates than for shorter periodicities (see Figure 2A  
207 and S2.1). Across changes in all parameter combinations, the redundancy-drift effect causes a  
208 maximum increase in  $V_A$  of 28% relative to the  $V_A$  maintained under  $m = 0.1$ , which was  
209 observed for  $P = 100$  and  $V_S = 10$ . Under a very long cycle ( $P = 1000$  generations), there is  
210 minimal response to migration rate (i.e., no effect of redundancy-drift) and very little increase in  
211 variance when  $\mu = 10^{-6}$  relative to simulations with shorter periods, but much more increase in  
212 variance under long periods at  $\mu = 10^{-4}$  (see Figure S2.1;  $V_A$  under  $P = 1000$  is 1.3 ~ 2.5-fold  
213 higher than  $P = 100$  under  $\mu = 10^{-4}$ ). The degree of increase in  $V_A$  under temporal heterogeneity  
214 relative to homogeneity therefore depends on mutation, period, and selection, but is typically  
215 considerably less than under spatial heterogeneity with intermediate migration.

216 **Combination of Spatial and Temporal heterogeneity, Set 4**

217 For spatial and temporal heterogeneity combined ( $\theta_{t,1} = \theta_{t,2} + 2$ ; see *SI* for illustration), the  
218 amount of  $V_A$  and patterns that arise are qualitatively similar to those in the case of pure spatial  
219 heterogeneity. Similar threshold behavior is observed, and similar levels of  $V_A$  are maintained,  
220 peaking between migration rates of 0.01 ~ 0.1, again depending on  $V_S$  (Figure 2B). Under this  
221 form of combined spatial and temporal heterogeneity, there is a max 31% increase in  $V_A$   
222 compared to pure spatial heterogeneity (at  $V_S = 5$ ,  $\mu = 10^{-4}$ ,  $m = 0.001$ ), which is very small when

223 compared to the 9.75-fold difference in  $V_A$  for the pure spatial heterogeneity vs. homogeneity  
224 under the same parameters  $V_S$  and  $\mu$ .

225 In contrast, the complex patterns involving periodicity described above that were observed in the  
226 purely temporal set do not appear to carry over under combined spatial and temporal  
227 heterogeneity, likely because they are swamped out by the relatively larger effect of migration,  
228 which is relatively consistent across different period lengths (see S2.2). There is an overall  
229 increase in  $V_A$  maintained, which appears more similar to the case of pure spatial heterogeneity  
230 than pure temporal heterogeneity or homogeneity. This result is perhaps unexpected, as spatial  
231 and temporal effects of heterogeneity might be expected to work synergistically.

### 232 **Comparing Sets**

233 Figure 3 shows a comparison amongst the six different patterns of environmental variation for a  
234 subset of the total parameter combinations used. For a given parameter set, there is a general  
235 trend of increased  $V_A$  maintained with an increase in heterogeneity, particularly with the degree  
236 of spatial heterogeneity between patches. Temporal heterogeneity on its own does little to  
237 increase  $V_A$  compared to the homogeneous set. When temporal heterogeneity is combined with  
238 spatial heterogeneity, the increase in  $V_A$  is most pronounced in sets where the temporal  
239 fluctuations in the two patches are most out of phase (Figure 3; see *SI* for relation between  $\theta_{t,1}$  and  
240  $\theta_{t,2}$ ). Of the three combinations investigated, subset 4B – where  $\theta_{t,1} \neq \theta_{t,2}$  for any  $t$  – maintains a  
241 considerable higher level of  $V_A$  compared to subset 4A, which in turn maintained more  $V_A$  than  
242 in 4C, which was most in phase between patches. This further supports the emphasis on spatial  
243 heterogeneity over temporal heterogeneity as a stronger force for maintaining variation.

244 To explore whether environmental heterogeneity could yield more realistic ratios of  $V_A/V_S$  (ie,  
245  $0.04 < V_A/V_S < 0.12$ ), we compared values for this ratio under homogeneous vs. heterogeneous  
246 simulation scenarios with all other parameters held constant (Figure 4). Without any spatial  
247 heterogeneity, none of the parameter combinations result in  $V_A$  that falls within this range for  
248 expected typical values (see S4, S5 for simulation sets that did not fall into range). However, with  
249 spatial heterogeneity, the combination of high migration ( $m \geq 0.01$ ) and strong selection ( $V_S = 2$   
250 or 5) does result in  $V_A$  within the typical range (i.e. an increase of  $\sim 10x$  relative to MSB). For the  
251 combination of spatial and temporal heterogeneity, there is little change for most parameter  
252 combinations compared to spatial heterogeneity alone (Figure 4B); for those where there is a

253 noticeable deviation, whether the parameter set falls in or out of the target range remains  
254 unchanged (with an exception at  $V_S = 2$ ,  $m = 0.001$ ).

## 255 **Discussion**

256 The results of these simulations show that environmental heterogeneity can have a large impact  
257 on the maintenance of additive genetic variation ( $V_A$ ) under a variety of parameters. The  
258 direction and magnitude of this impact depends upon the rate of migration between  
259 subpopulations, with intermediate rates of dispersal providing the largest effect. This effect is  
260 also dependent on the type of environmental heterogeneity – spatial, temporal, or a combination  
261 of both all result in different magnitude and pattern of response to migration. Spatial  
262 heterogeneity has a much larger effect than temporal, and the effect of combined heterogeneity  
263 increases with the degree of spatial difference when temporal oscillations in each patch are more  
264 out of phase.

## 265 **The Redundancy-Drift Effect**

266 For a range of migration rates (dependent on  $V_S$  and  $\mu$ ) spatial environmental heterogeneity  
267 substantially increases the variation a population can maintain. However, migration alone, even  
268 between two environmentally similar patches, can increase the variation maintained at very low  
269 rates of migration. This result is due to the interaction of genetic redundancy and the stochastic  
270 force of genetic drift, as described by Goldstein and Holsinger (1992). With enough population  
271 structure (i.e., limited gene flow), the genotypes existing in each patch are expected to undergo  
272 different histories of mutation and drift, resulting in relatively independent fluctuations in allele  
273 frequency within each patch, and possibly local fixation or loss. Over time, this results in a  
274 different pool of genotypes present in each patch, even if the mean phenotype is equivalent.  
275 Migration between patches with different allele frequencies will then increase the variance within  
276 patches; movement of individuals adapted to a given environment with one complement of  
277 alleles that result in a similarly fit phenotype, such that it can be maintained in the new  
278 population, then this flux of allelic variants/combinations should increase the variation  
279 maintained in the population. This effect is mainly dependent on two factors: (1) the number of  
280 possible redundant genotypes, and (2) the degree of population structure – patches must be  
281 sufficiently connected such that new genotypes can be introduced by migration at a high enough  
282 rate to affect genetic variance, but not overly connected such that drift is no longer acting

283 (relatively) independently in each patch. This genetic redundancy-drift effect is evident in the  
284 control case, where there is an observable – albeit minimal – response to low migration, which  
285 persists regardless of population size, rate of mutation, or strength of selection. This effect is  
286 somewhat increased under temporal heterogeneity, resulting in larger peaks over the same range  
287 of low dispersal as the homogeneous case, particularly under high mutation and strong selection  
288 ( $\mu = 0.0001$ ,  $V_S = 2$ ). The increase of this effect may be due to the temporally variable selection  
289 within each patch causing different alleles to change in frequency more rapidly than migration  
290 homogenizes differences, resulting in a larger pool of differentiated loci than would be generated  
291 by drift alone.

## 292 **Environmental Heterogeneity**

293 Nonetheless, this redundancy-drift effect is small relative to the effect of spatial heterogeneity. In  
294 this case, selection acts to pull each subpopulation towards its optima, resulting in different allele  
295 frequencies within in each patch. With migration, the alleles that would otherwise be purged by  
296 selection are persistently reintroduced into the other patch, increasing the  $V_A$  maintained in the  
297 population. However, there is a threshold behavior to this system – a critical migration rate  
298 beyond which polymorphism can no longer be maintained (Felsenstein 1976; Yeaman and Otto  
299 2001). Past this point, the allele frequencies of each patch are similar enough that migrants are  
300 much less likely to re-introduce novel/differentiated alleles, and the effect of migration on  $V_A$  is  
301 reduced.

302

303 Most populations experience some form of temporally variable selection, be it seasonal  
304 fluctuations or some otherwise unstable environment. Due to this, there has been much interest  
305 around fluctuating selection and its effect(s) on the maintenance of variation (Kondrashov &  
306 Yampolsky, 1996; Bürger & Gimelfarb, 2002; Siepielski *et al.*, 2009; Morrissey & Hadfield,  
307 2012; Gulisija & Kim, 2015). Difficulties arise when attempting to draw comparisons across such  
308 studies due to a variety of different assumptions, such as the way in which the moving optimum  
309 is modelled and the nature of the underlying genetic architecture. A simple sinusoidal wave is  
310 generally used, but varying parameters of this function (amplitude, center, periodicity) appear to  
311 have complex interactions with each other as well as other parameters such as mutation rate and  
312 genetic redundancy.

313 Burger and Gimelfarb (2002) found that in a diallelic multi-locus model with recurrent mutation,  
314 the relative genetic variance increased with period length (typically  $\geq 24$  generations), but the  
315 magnitude of change and pattern of response to period depended on the amplitude of the  
316 oscillations. They observed the highest levels of genetic variance when the amplitude was set  
317 such that the optimum cycled between the most extreme possible genotypes, and that greater  
318 amplitudes, where the optimum fell beyond the maximum possible genotypic values, resulted in a  
319 decline in  $V_A$  at high period lengths ( $\geq 52$  generations). However, given the small number of loci  
320 (2 - 6) and scaling of allelic effects, this represents a scenario with highly non-redundant genetics.  
321 By contrast, Kondrashov and Yampolsky (1996) explored the maintenance of variation under  
322 temporal heterogeneity with high genetic redundancy and found that a considerable increase in  
323 variance ( $\sim 3$  orders of magnitude) was observed when the amplitude of the fluctuations of the  
324 optimum exceeded the width of the fitness function (amplitude,  $d > \sqrt{[S^2 + V_E]}$ ). While the  
325 assumptions they made about allele effect size and number of loci meant that the local optimum  
326 never exceeded the maximum/minimum possible phenotypes, the large amplitude implied by the  
327 above inequality results in unnaturally large differences in fitness for a given phenotype over  
328 time. For example, an individual with a phenotype equal to  $+d$  would suffer a fitness cost of 86%  
329 when the optimum =  $-d$ , when  $S = d$  and  $V_E = 0$ . Similarly, for the standard set of parameters used  
330 in their simulations where substantial variance was maintained, the fitness cost for the same  
331 difference in phenotype exceeded 99%. By comparison, the fitness cost for the same difference in  
332 phenotype in our simulations was 63% (under strongest selection,  $V_S = 2$ ; this fitness cost is  
333 reduced to 18% under weaker selection,  $V_S = 10$ ). Common garden experiments typically show  
334 an overall magnitude of local adaptation of  $\sim 45\%$  (Hereford 2009), so the selection regimes used  
335 by Kondrashov and Yampolsky (1996) constitute much stronger selection than normally  
336 observed. Thus, while they found that temporal heterogeneity could maintain much more  
337 variance than observed in our simulations, this was likely a consequence of drastic changes in  
338 fitness causing the underlying alleles to cycle rapidly in frequency, with increases in  $V_A$  as the  
339 alleles reached intermediate frequency. Thus, the capacity for temporal heterogeneity to maintain  
340 substantial amounts of variance seems to depend upon either very extreme environmental  
341 fluctuations or a narrow range of rapid fluctuations with strict assumptions on the amount of  
342 genetic redundancy available. As empirical data become available for quantitative analyses of a  
343 population undergoing temporal variation, this will provide a realistic standard set of parameter

344 values to be used in theory studies, allowing for a more quantitative assessment of the likely  
345 effects of temporal fluctuations, and further evaluation of the relative importance of the above  
346 models.

347  
348 **Spatial v. Temporal v. Combined heterogeneity**  
349 Interestingly, it appears that spatial heterogeneity has a much stronger effect than temporal, both  
350 in isolation and when combined. This is evidenced by the difference in magnitude of  $V_A$   
351 maintained in Sets 2 vs. 3 (pure spatial and pure temporal heterogeneity, respectively), as well as  
352 the comparisons among the three scenarios of combined spatial and temporal heterogeneity (Set 4  
353 A, B, C). The combination of spatial and temporal heterogeneity only marginally increased the  
354 variation maintained by spatial heterogeneity alone, and only in the case of complete spatial  
355 heterogeneity (Set 4B). Interestingly, among the three combined sets,  $V_A$  increased with the  
356 spatial component (in general,  $V_A[4C] \leq V_A[4A] \ll V_A[4B]$ ), which was robust to changes in  $\mu$   
357 and  $V_S$ .

358 Thus, our results indicate that spatial heterogeneity is more important for the maintenance of  
359 variation than a temporally fluctuating environment, at least for the genetic architectures and  
360 assumptions about fitness used here. Additionally, from the ratio  $V_A/V_S$  (Figure 4 and S2),  
361 temporal fluctuations alone fail to result in any simulation maintaining significantly more  
362 variation than under homogenous conditions, indicating that it is insufficient as an additional  
363 mechanism to explain the discrepancy between mutation-selection balance models and empirical  
364 observations.

### 365 **Does heterogeneity maintain sufficient variation to explain empirical** 366 **observations?**

367 Given empirical estimates of selection and heritability, a realistic amount of variation maintained  
368 in a population should fall within the range  $V_A/V_S$  0.04 ~ 0.12, which would require either an  
369 unrealistically large number of loci or very high mutation rates under models of mutation-  
370 selection balance, as described in the introduction. To explore whether heterogeneity could result  
371 in more realistic ratios of  $V_A/V_S$ , we compared simulations run under homogeneous vs.  
372 heterogeneous conditions, and examined the degree to which heterogeneity increased this ratio.  
373 The shift towards this window for simulations with spatial heterogeneity suggests that this is a

374 viable mechanism for the maintenance of variation, but is limited to populations experiencing  
375 strong selection and high migration rates.

376 The results presented in Figure 4 are intended to illustrate how the maintenance of realistic levels  
377 of  $V_A$  is possible under environmental heterogeneity, rather than to represent the full span of  
378 parameter combinations that result in realistic behavior. Little is known about the true values for  
379 many parameters involved, and changes in some values, such as the number of loci, are likely to  
380 alter the quantitative results. Instead, these results illustrate that for a given set of assumptions  
381 about the genetic basis of a trait, considerably more variation can be maintained by migration-  
382 selection balance than mutation-selection balance. Moreover, the magnitude of this change can be  
383 sufficient to explain empirical observations in some cases, indicating environmental  
384 heterogeneity is a viable mechanism to consider for the maintenance of variation. However, we  
385 stress that given the sensitivity of this result to the balance between selection and migration and  
386 the narrowness of the region that maintains significantly more variance, it seems unlikely that  
387 environmental heterogeneity will generally resolve the “paradox of variation”.

### 388 **Limitations**

389 A major limitation to the interpretation of this study is the difficulty in comparing results to  
390 established analytic models due to differences in the mutation scheme. The majority of theory  
391 and analytic models assume either a single (or few with equal effect) diallelic loci, or quantitative  
392 traits with a normally distributed continuum of alleles. Our simulations attempt to combine the  
393 two – varying allelic effects across loci ( $a_i$ ), but with a single  $|a|$  per locus, and a Gamma  
394 distribution of possible values  $a_i$ . We chose this approach to reflect a (potentially) more  
395 biologically realistic scheme of mutation. For example, evidence suggests that the distribution of  
396 allelic effects at a locus is more likely to follow a gamma rather than a normal distribution, with a  
397 small number of loci of large effect and many loci of small effect (Orr, 2003). However, this  
398 leads to a less straight-forward parameterization of  $V_m$  or  $\alpha^2$ , which causes challenges when  
399 attempting analytical comparisons.

400 Another limiting factor is the difficulty of obtaining measurements of migration rates in natural  
401 populations, which is necessary to understand if the range where this effect of environmental  
402 heterogeneity occurs is realistic. Evidence of migration maintaining quantitative genetic variation  
403 in spatially heterogeneous environments was found in lodgepole pine (Yeaman & Jarvis, 2006),

404 but genomic signatures at individual loci may be difficult to detect. Though we did not  
405 specifically quantify this here, presumably there is some effect on heterozygosity, though such  
406 effects could be difficult to detect in empirical data.

### 407 **Implications**

408 We have shown that spatial environmental heterogeneity and migration has the potential to  
409 increase genetic variance substantially, while temporal heterogeneity has a much more modest  
410 effect. As local adaptation is common (Hereford, 2009), this may be an important factor affecting  
411 evolvability. It has been noted that conservation management lacks proper consideration of  
412 evolutionary theory, implementation of which can improve overall efforts and long-term outcome  
413 (Cook & Sgrò, 2017). The described effect of migration suggests that the ecology underlying the  
414 maintenance of variation may be important to consider when planning conservation efforts with a  
415 focus on genetics.

416 For example, a major criterion for the IUCN (International Union for Conservation of Nature)  
417 Red List status is population size, however there are examples of listed populations that have  
418 remained relatively stable, despite small  $N_e$  (Ex. Florida Panthers, *Puma concolor coryi*; (Benson  
419 *et al.*, 2011)). The genetic consequences of population size have been emphasized due to [entirely  
420 legitimate] concerns about reduced diversity, which is often used as a proxy measure for the  
421 ‘health’ of a population of concern in conservation biology. Here, we showed that a 10-fold  
422 change in population size had less effect on  $V_A$  than a reduction in migration, which suggests that  
423 migration may also be an important factor to consider when assessing and managing the genetic  
424 health of populations of concern. Indeed, the related concepts of gene flow and connectivity have  
425 been previously suggested for consideration and implementation in conservation management,  
426 albeit with some contention, as too much migration can result in a reduction of variability (Weeks  
427 *et al.*, 2011; Urban *et al.*, 2012; Cook & Sgrò, 2017). Long-term maintenance of evolvability may  
428 depend in some cases on an intact and interconnected environment, rather than endogenous  
429 generation of variation (mutation-selection), which would depend less on environment.  
430 Therefore, a move towards improving connectivity between subpopulations and protection  
431 against habitat fragmentation may be a pertinent consideration for the maintenance of  
432 quantitative genetic variation, in addition to the well-recognized problems of reducing inbreeding  
433 and mitigating demographic fluctuations.



434

435 In conclusion, our results demonstrate a clear effect of migration on the maintenance of variation  
436 in all four investigated scenarios, and highlight the potential for environmental heterogeneity to  
437 substantially increase  $V_A$ . However, it seems unlikely that a single mechanism best explains the  
438 maintenance of variation that we see in nature; rather the many concepts put forth over the past  
439 decades may be viable explanations in only certain scenarios, just as has been demonstrated here  
440 with environmental heterogeneity. Further investigation into potential mechanisms, particularly  
441 into those scenarios under which they succeed and fail, and how biologically relevant successful  
442 scenarios may be, is needed in order to get a complete picture of the fundamental process that is  
443 the maintenance of variation.

## Literature

- 444 Barton, N. & Turelli, M. 1989. Evolutionary Quantitative Genetics: How Little Do We Know.  
445 *Annu. Rev. Genet.* **23**: 337–370.
- 446 Barton, N.H. 1986. The maintenance of polygenic variation through a balance between mutation  
447 and stabilizing selection. *Genet. Res.* **47**: 209–216.
- 448 Benson, J.F., Hostetler, J.A., Onorato, D.P., Johnson, W.E., Roelke, M.E., O’Brien, S.J., *et al.*  
449 2011. Intentional genetic introgression influences survival of adults and subadults in a small,  
450 inbred felid population. *J. Anim. Ecol.* **80**: 958–967.
- 451 Bulmer, M.G. 1972. The genetic variability of polygenic characters under optimizing selection,  
452 mutation and drift. *Genet. Res.* **19**: 17–25.
- 453 Bürger, R. 2000. *The mathematical theory of selection, recombination, and mutation*. Wiley.
- 454 Bürger, R. & Gimelfarb, A. 2002. Fluctuating environments and the role of mutation in  
455 maintaining quantitative genetic variation. *Genet. Res.* **80**: 31–46.
- 456 Bürger, R., Wagner, G.P. & Stettinger, F. 1989. How Much Heritable Variance Can be  
457 Maintained in Finite Populations by Mutation Selection Balance. *Evolution (N. Y.)* **43**:  
458 1748–1766.
- 459 Cook, C.N. & Sgrò, C.M. 2017. Aligning science and policy to achieve evolutionarily  
460 enlightened conservation. *Conserv. Biol.* **31**: 501–512.
- 461 Guillaume, F. & Rougemont, J. 2006. Nemo: an evolutionary and population genetics  
462 programming framework. *Bioinformatics* 2556–2557.
- 463 Gulisija, D. & Kim, Y. 2015. Emergence of long-term balanced polymorphism under cyclic  
464 selection of spatially variable magnitude. *Evolution (N. Y.)* **69**: 979–992.
- 465 Hereford, J. 2009. A quantitative survey of local adaptation and fitness trade-offs. *Am. Nat.* **173**:  
466 579–88.
- 467 Houle, D. 1992. Comparing evolvability and variability of quantitative traits. *Genetics* **130**: 195–  
468 204.

- 469 Johnson, T. & Barton, N. 2005. Theoretical models of selection and mutation on quantitative  
470 traits. *Philos. Trans. R. Soc. Lond. B. Biol. Sci.* **360**: 1411–25.
- 471 Kimura, M. 1965. A stochastic model concerning the maintenance of genetic variability in  
472 quantitative characters. *Proc. Natl. Acad. Sci. U. S. A.* **54**: 731–736.
- 473 Kimura, M. & Crow, J.F. 1964. the Number of Alleles That Can Be Maintained in a Finite  
474 Population. *Genetics* **49**: 725–738.
- 475 Kingsolver, J.G., Hoekstra, H.E., Hoekstra, J.M.M., Berrigan, D., Vignieri, S.N.N., Hill, C.E.E.,  
476 *et al.* 2001. The strength of phenotypic selection in natural populations. *Am. Nat.* **157**: 245–  
477 261.
- 478 Kondrashov, A.S. & Yampolsky, L.Y. 1996. High genetic variability under the balance between  
479 symmetric mutation and fluctuating stabilizing selection. *Genet. Res.* **68**: 157–164.
- 480 Lande, R. 1976. The maintenance of genetic variability by mutation in a polygenic character with  
481 linked loci. *Genet. Res.* **26**: 221–235.
- 482 Lythgoe, K.A. 1997. Consequences of gene flow in spatially structured populations. *Genet. Res.*  
483 **69**: 49–60.
- 484 Mackay, T.F.C., Stone, E.A. & Ayroles, J.F. 2009. The genetics of quantitative traits: challenges  
485 and prospects. *Nat. Rev. Genet.* **10**: 565–577.
- 486 Maher, B. 2008. Personal genomes: The case of the missing heritability. *Nature* **456**: 18–21.  
487 Nature Publishing Group.
- 488 Morrissey, M.B. & Hadfield, J.D. 2012. Directional selection in temporally replicated studies is  
489 remarkably consistent. *Evolution (N. Y.)*. **66**: 435–442.
- 490 Mousseau, T.A. & Roff, D.A. 1987. Natural selection and the heritability of fitness components.  
491 *Heredity (Edinb.)*. **59**: 181–197. The Genetical Society of Great Britain.
- 492 Orr, H.A. 2003. The distribution of fitness effects among beneficial mutations. *Genetics* **163**:  
493 1519–26.
- 494 R Development Core Team. 2016. R: a language and environment for statistical computing. R

- 495 Foundation for Statistical Computing, Vienna, Austria.
- 496 Siepielski, A.M., Dibattista, J.D. & Carlson, S.M. 2009. It's about time: The temporal dynamics  
497 of phenotypic selection in the wild. *Ecol. Lett.* **12**: 1261–1276.
- 498 Spichtig, M. & Kawecki, T.J. 2004. The maintenance (or not) of polygenic variation by soft  
499 selection in heterogeneous environments. *Am. Nat.* **164**: 70–84. The University of Chicago  
500 Press.
- 501 Tufto, J. 2000. Quantitative genetic models for the balance between migration and stabilizing  
502 selection. *Genet. Res.* **76**: 285–293.
- 503 Turelli, M. 1984. Heritable genetic variation via mutation-selection balance: Lerch's zeta meets  
504 the abdominal bristle. *Theor. Popul. Biol.* **25**: 138–193.
- 505 Urban, M.C., De Meester, L., Vellend, M., Stoks, R. & Vanoverbeke, J. 2012. A crucial step  
506 toward realism: responses to climate change from an evolving metacommunity perspective.  
507 *Evol. Appl.* **5**: 154–167. Blackwell Publishing Ltd.
- 508 Weeks, A.R., Sgro, C.M., Young, A.G., Frankham, R., Mitchell, N.J., Miller, K.A., *et al.* 2011.  
509 Assessing the benefits and risks of translocations in changing environments: A genetic  
510 perspective. *Evol. Appl.* **4**: 709–725. Blackwell Publishing Ltd.
- 511 Yeaman, S. & Guillaume, F. 2009. Predicting adaptation under migration load: The role of  
512 genetic skew. *Evolution (N. Y.)*. **63**: 2926–2938.
- 513 Yeaman, S. & Jarvis, A. 2006. Regional heterogeneity and gene flow maintain variance in a  
514 quantitative trait within populations of lodgepole pine. *Proc. R. Soc. B Biol. Sci.* **273**: 1587–  
515 1593.
- 516 Yeaman, S. & Otto, S.P. 2011. Establishment and maintenance of adaptive genetic divergence  
517 under migration, selection, and drift. *Evolution (N. Y.)*. **65**: 2123–2129.
- 518 Zhang, X.S. & Hill, W.G. 2005. Genetic variability under mutation selection balance. *Trends*  
519 *Ecol. Evol.* **20**: 468–470.
- 520 Zhang, X.S. & Hill, W.G. 2002. Joint effects of pleiotropic selection and stabilizing selection on

- 521 the maintenance of quantitative genetic variation at mutation-selection balance. *Genetics*  
522 **162**: 459–471.
- 523 Zhang, X.S., Wang, J. & Hill, W.G. 2004. Influence of Dominance, Leptokurtosis and Pleiotropy  
524 of Deleterious Mutations on Quantitative Genetic Variation at Mutation-Selection Balance.  
525 *Genetics* **166**: 597–610.
- 526 Zhang, X.S., Wang, J. & Hill, W.G. 2002. Pleiotropic model of maintenance of quantitative  
527 genetic variation at mutation-selection balance. *Genetics* **161**: 419–433.
- 528

529 **Tables and Figure Captions**

530 **Table 1.** Description of Parameters

| <b>Parameter</b>     | <b>Definition</b>                                                                                                         | <b>Value</b>                                           |
|----------------------|---------------------------------------------------------------------------------------------------------------------------|--------------------------------------------------------|
| <b>N</b>             | Population size                                                                                                           | 1000, 10 000                                           |
| <b>V<sub>s</sub></b> | Selection strength                                                                                                        | 2, 5, 10                                               |
| <b>μ</b>             | Mutation rate                                                                                                             | 10 <sup>-6</sup> , 10 <sup>-5</sup> , 10 <sup>-4</sup> |
| <b>m</b>             | Backwards migration rate                                                                                                  | 0.00001 ~ 0.1                                          |
| <b>θ</b>             | Local (patch) optimum                                                                                                     |                                                        |
| <b>P</b>             | Periodicity; time (as the number of generations) over which temporal oscillations complete one cycle of a sinusoidal wave | 4, 16, 40, 100, 1000                                   |

531

## 532 **Figure Captions**

533 **Figure 1.** Effect of migration on the maintenance of genetic variation ( $V_A$ ) in a sub-divided  
534 population ( $N=1000$ ) between (A) homogeneous patches, (B) spatially heterogeneous patches,  
535 under combinations of different mutation rate (line colour;  $\mu = \{10^{-6}, 10^{-5}, 10^{-4}\}$ ) and selection  
536 strength (panels;  $V_S = \{2, 5, 10\}$ ). The homogeneous environment type (broken line) represents  
537 the case of mutation-selection balance.

538 **Figure 2.** Effect of migration on the maintenance of genetic variation ( $V_A$ ) in a sub-divided  
539 population ( $N=1000$ ) between (A) temporal, (B) combined spatial and temporal, environmentally  
540 heterogeneous patches under combinations of different mutation rate (line colour;  $\mu = \{10^{-6}, 10^{-5},$   
541  $10^{-4}\}$ ) and selection strength (panels;  $V_S = \{2, 5, 10\}$ ). The homogeneous environment type  
542 (broken line) represents the case of mutation-selection balance.

543 Period = 100 generations

544 **Figure 3.** Comparison of the amount of genetic variation ( $V_A$ ) maintained in a population  
545 simulated under scenarios with increasing degree of environmental heterogeneity, for various  
546 rates of migration ( $m$ ) and strength of selection ( $V_S = \{2, 5, 10\}$ ; panels).

547  $N=1000$ ;  $\mu = 10^{-4}$ , Period = 100 generations

548 **Figure 4.** Comparison of the ratio of variance components,  $V_A/V_S$ , between simulations of  
549 different pattern of environmental heterogeneity for various combinations of migration rate ( $m$ ;  
550 point colour), mutation rate ( $\mu = \{10^{-6}, 10^{-5}, 10^{-4}\}$ ), and selection strength (point shape;  $V_S = \{2,$   
551  $5, 10\}$ ). The grey box represents the range of predicted 'typical' values expected based on  
552 empirical estimates of trait heritability ( $h^2$  0.2 ~ 0.6). Points that fall below the 1:1 line (dashed)  
553 are parameter combinations under which more  $V_A$  is maintained without (A) environmental  
554 heterogeneity, or (B) addition of temporal heterogeneity (Period = 100).  $N=1000$

555

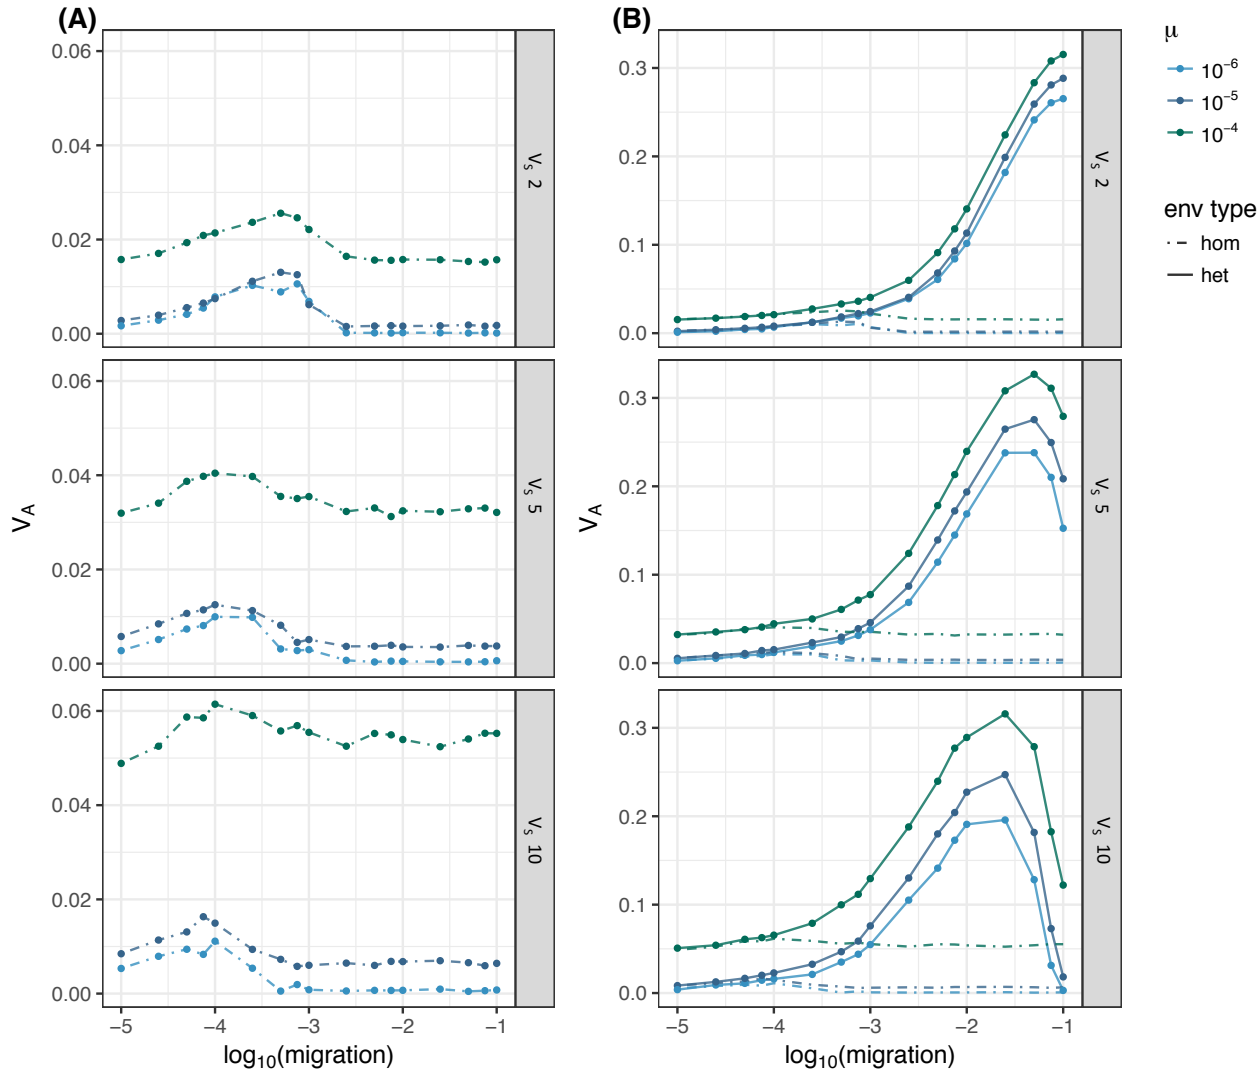

**Figure 1.** Effect of migration on the maintenance of genetic variation ( $V_A$ ) in a sub-divided population ( $N=1000$ ) between (A) homogeneous patches, (B) spatially heterogeneous patches, under combinations of different mutation rate (line colour;  $\mu = \{10^{-6}, 10^{-5}, 10^{-4}\}$ ) and selection strength (panels;  $V_s = \{2, 5, 10\}$ ). The homogeneous environment type (broken line) represents the case of mutation-selection balance



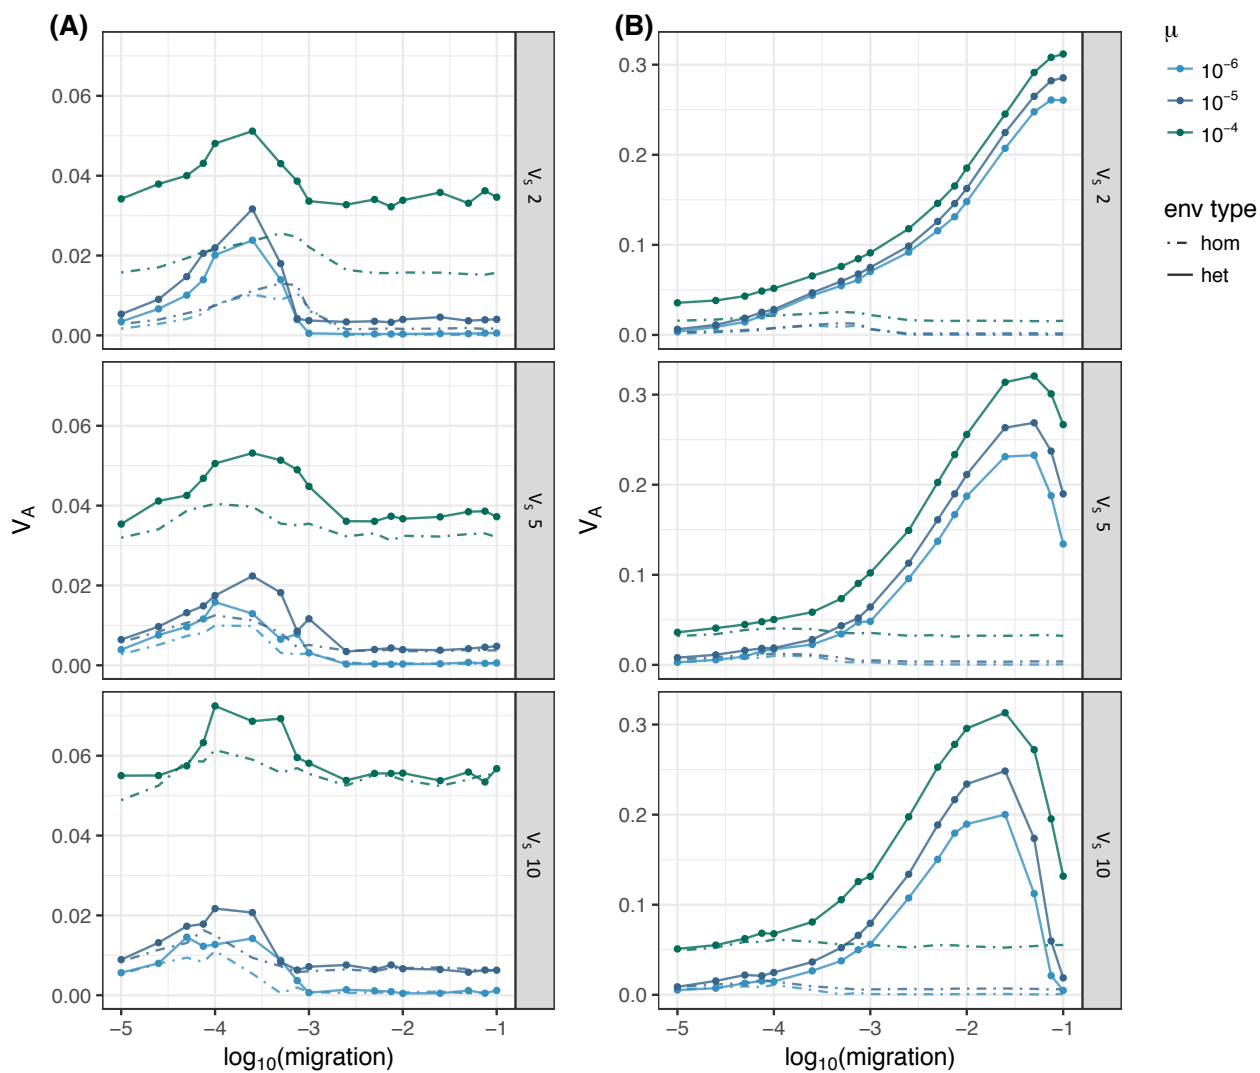

**Figure 2.** Effect of migration on the maintenance of genetic variation ( $V_A$ ) in a sub-divided population ( $N=1000$ ) between (A) temporal, (B) combined spatial and temporal, environmentally heterogeneous patches under combinations of different mutation rate (line colour;  $\mu = \{10^{-6}, 10^{-5}, 10^{-4}\}$ ) and selection strength (panels;  $V_S = \{2, 5, 10\}$ ). The homogeneous environment type (broken line) represents the case of mutation-selection balance.

Period = 100 generations

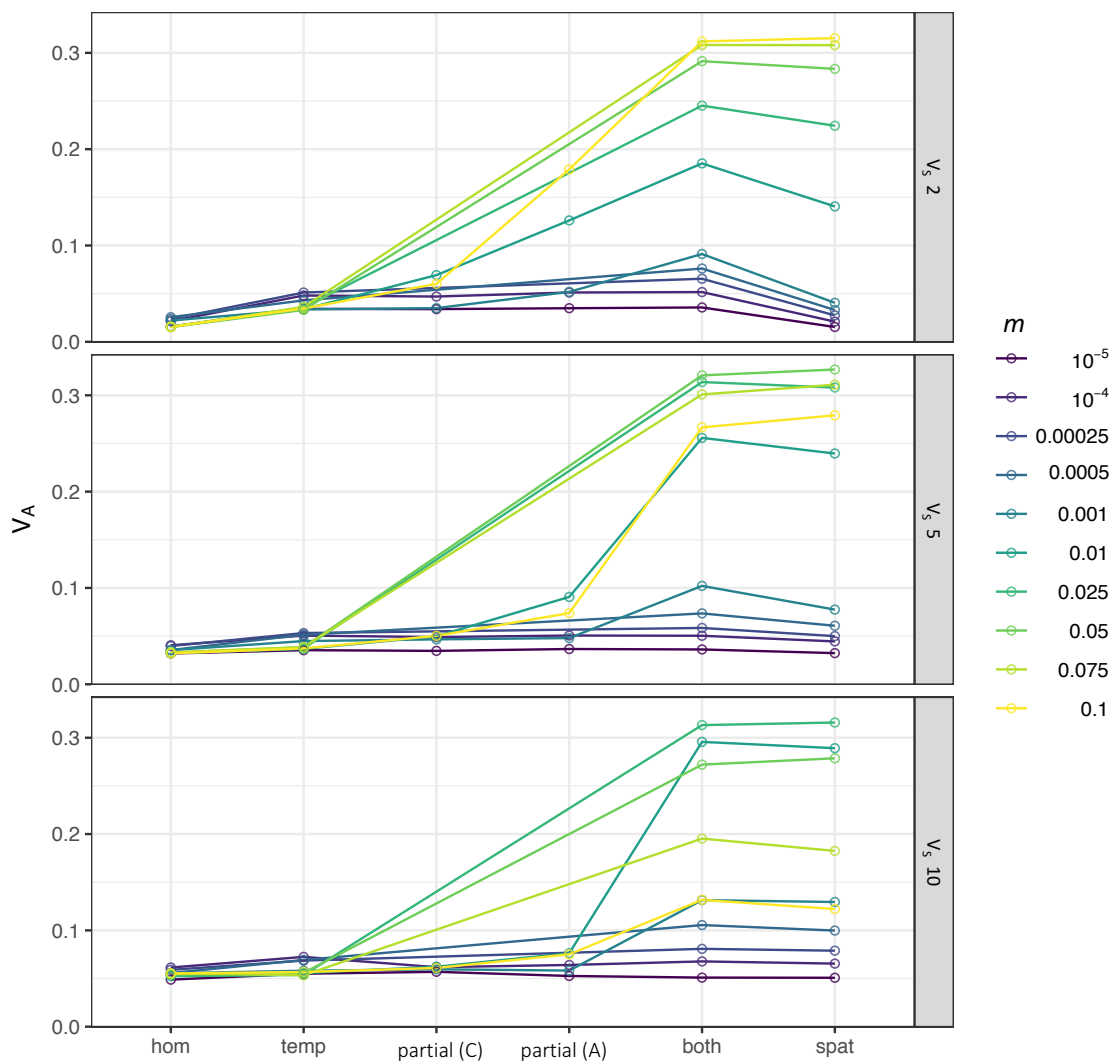

**Figure 3.** Comparison of the amount of genetic variation ( $V_A$ ) maintained in a population simulated under scenarios with increasing degree of environmental heterogeneity, for various rates of migration ( $m$ ) and strength of selection ( $V_s = \{2, 5, 10\}$ ; panels).  $N=1000$ ;  $\mu = 10^{-4}$ , Period = 100 generations

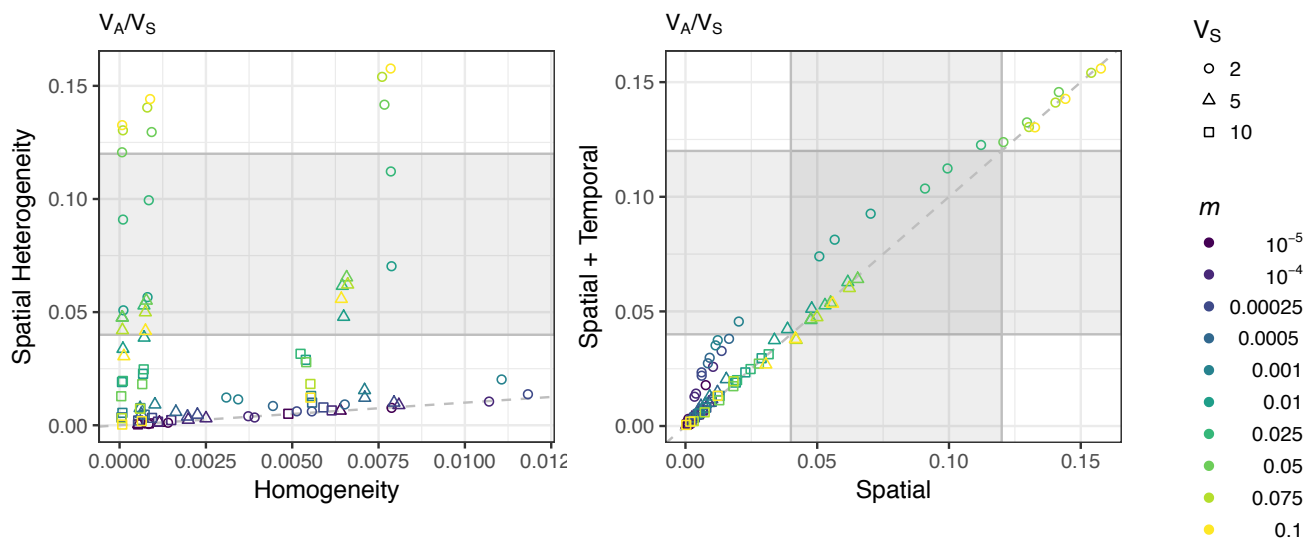

**Figure 4.** Comparison of the ratio of variance components,  $V_A/V_S$ , between simulations of different patterns of environmental heterogeneity for various combinations of migration rate ( $m$ ; point colour), mutation rate ( $\mu = \{10^{-6}, 10^{-5}, 10^{-4}\}$ ), and selection strength (point shape;  $V_S = \{2, 5, 10\}$ ). The grey box represents the range of predicted 'typical' values expected based on empirical estimates of trait heritability ( $h^2 \approx 0.2 \sim 0.6$ ). Points that fall below the 1:1 line (dashed) are parameter combinations under which more  $V_A$  is maintained without (A) environmental heterogeneity, or (B) addition of temporal heterogeneity (Period = 100).  $N=1000$
